# Supplementary material for: Comprehensive machine-learning survival framework develops a consensus model in large-scale multicenter cohorts for pancreatic cancer
Source: eLife. 2022 Oct 25;11:e80150. doi: 10.7554/eLife.80150 (PMC9596158; doi:10.7554/eLife.80150)
Supplement: Figure 1—source data 1. [file elife-80150-fig1-data1.xlsx]

## Sheet: Figure1-source data 1
Figure 1-source data 1. Details of baseline information in 13 public datasets
Accession	TCGA-PAAD	PACA-AU-Seq	PACA-AU-Array	PACA-CA-Seq	E-MTAB-6134	GSE62452	GSE28735	GSE78229	GSE79668	GSE85916	GSE21501	GSE57495	GSE71729
Number of Patients	176 (100%)	81 (100%)	267 (100%)	182 (100%)	288 (100%)	65 (100%)	42 (100%)	49 (100%)	51 (100%)	79 (100%)	102 (100%)	63 (100%)	125 (100%)
Event
Alive	84 (47.7%)	32 (39.5%)	106 (39.7%)	34 (18.7%)	107 (37.2%)	16 (24.6%)	13 (31.0%)	14 (28.6%)	6 (11.8%)	22 (27.8%)	36 (35.3%)	21 (33.3%)	41 (32.8%)
Dead	92 (52.3%)	49 (60.5%)	161 (60.3%)	148 (81.3%)	181 (62.8%)	49 (75.4%)	29 (69.0%)	35 (71.4%)	45 (88.2%)	57 (72.2%)	66 (64.7%)	42 (66.7%)	84 (67.2%)
Age
<=65	93 (52.8%)	34 (42.0%)	116 (43.4%)	78 (42.9%)	--	--	--	--	25 (49.0%)	--	--	--	--
>65	83 (47.2%)	46 (56.8%)	150 (56.2%)	86 (47.3%)	--	--	--	--	26 (51.0%)	--	--	--	--
Not available	--	1 ( 1.2%)	1 ( 0.4%)	18 ( 9.9%)	--	--	--	--	--	--	--	--	--
Gender
Female	80 (45.5%)	41 (50.6%)	125 (46.8%)	82 (45.1%)	122 (42.4%)	--	--	--	19 (37.3%)	--	--	--	--
Male	96 (54.5%)	40 (49.4%)	142 (53.2%)	99 (54.4%)	166 (57.6%)	--	--	--	32 (62.7%)	--	--	--	--
Not available	--	--	--	1 ( 0.5%)	--	--	--	--	--	--	--	--	--
Stage
Ⅰ+Ⅱ	166 (94.3%)	75 (92.6%)	251 (94.0%)	146 (80.2%)	--	49 (75.4%)	--	4 (8.2%)	--	--	--	13 (20.6%)	--
Ⅲ+Ⅳ	7 ( 4.0%)	5 ( 6.2%)	122 (4.5%)	7 (3.8%)	--	16 (24.6%)	--	45 (91.8%)	--	--	--	50 (79.4%)	--
Not available	3 (1.7%)	1 (1.2%)	4 (1.5%)	29 (15.9%)	--	--	--	--	--	--	--	--	--
T stage
T1+T2	31 (17.6%)	9 (11.1%)	45 (16.8%)	--	51 (17.7%)	--	--	--	15 (29.4%)	--	18 (17.6%)	--	--
T3+T4	143 (81.2%)	70 (86.4%)	218 (81.6)	--	237 (82.3%)	--	--	--	36 (70.6%)	--	80 (78.4%)	--	--
Not available	2 ( 1.1%)	2 ( 2.5%)	4 ( 1.5%)	--	--	--	--	--	--	--	4 (3.9%)	--	--
N stage
N0	49 (27.8%)	26 (32.1%)	63 (23.6%)	--	72(25.0%)	--	--	--	14 (27.5%)	--	28 (27.5%)	--	--
N1+N2	122 (69.3%)	53 (65.4%)	199 (74.5%)	--	216 (75.0%)	--	--	--	37 (72.5%)	--	73 (71.6%)	--	--
Not available	5 ( 2.8%)	2 (2.5%)	5 (1.9%)	--	--	--	--	--	--	--	1 (1.0%)	--	--
Grade
G1-2	124 (70.5%)	49 (60.5%)	22 ( 8.2%)	--	240 (83.3%)	34 (52.3%)	--	26 (53.1%)	--	--	--	--	--
G3-4	50 (28.4%)	29 (35.8%)	241 (90.3%)	--	48 (16.7%)	30 (46.2%)	--	22 (44.9%)	--	--	--	--	--
Not available	2 (1.1%)	3 (3.7%)	4 (1.5%)	--	--	1 ( 1.5%)	--	1 ( 2.0%)	--	--	--	--	--
Relapse status
No	46 (26.1%)	40 (49.4%)	120 (44.9%)	85 (46.7%)	73 (25.3%)	--	--	--	--	--	--	--	--
Yes	23 (13.1%)	41 (50.6%)	147 (55.1%)	97 (53.3%)	215 (74.7%)	--	--	--	--	--	--	--	--
Not available	107 (60.8%)	--	--	--		--	--	--	--	--	--	--	--
Radiation_therapy
No	100 (56.8%)	--	--	--	--	--	--	--	--	--	--	--	--
Yes	37 (21.0%)	--	--	--	--	--	--	--	--	--	--	--	--
Not available	39 (22.2%)	--	--	--	--	--	--	--	--	--	--	--	--
Alcohol
No	64 (36.4%)	--	--	--	--	--	--	--	--	--	--	--	--
Yes	100 (56.8%)	--	--	--	--	--	--	--	--	--	--	--	--
Not available	12 ( 6.8%)	--	--	--	--	--	--	--	--	--	--	--	--
Margin
R0	--	--	--	--	235 (81.6%)	--	--	--	--	--	--	--	--
R1	--	--	--	--	49 (17.0%)	--	--	--	--	--	--	--	--
Not available	--	--	--	--	4 ( 1.4%)	--	--	--	--	--	--	--	--
Site
Body&Tail	29 (16.5%)	--	--	--	--	--	--	--	--	--	--	--	--
Head	128 (72.7%)	--	--	--	--	--	--	--	--	--	--	--	--
Not available	19 (10.8%)	--	--	--	--	--	--	--	--	--	--	--	--
Diabetes
No	--	--	--	--	--	--	--	--	29 (56.9%)	--	--	--	--
Yes	--	--	--	--	--	--	--	--	22 (43.1%)	--	--	--	--
Not available	--	--	--	--	--	--	--	--	--	--	--	--	--
KRAS Status
Wild	--	--	--	--	31 (10.8%)	--	--	--	--	--	--	--	--
Mutation	--	--	--	--	230 (79.9%)	--	--	--	--	--	--	--	--
Not available	--	--	--	--	27 ( 9.4%)	--	--	--	--	--	--	--	--
TP53 Status
Wild	--	--	--	--	80 (27.8%)	--	--	--	--	--	--	--	--
Mutation	--	--	--	--	181 (62.8%)	--	--	--	--	--	--	--	--
Not available	--	--	--	--	27 ( 9.4%)	--	--	--	--	--	--	--	--
CDKN2A Status
Wild	--	--	--	--	220 (76.4%)	--	--	--	--	--	--	--	--
Mutation	--	--	--	--	41 (14.2%)	--	--	--	--	--	--	--	--
Not available	--	--	--	--	27 ( 9.4%)	--	--	--	--	--	--	--	--
