# Supplementary material for: Comprehensive machine-learning survival framework develops a consensus model in large-scale multicenter cohorts for pancreatic cancer
Source: eLife. 2022 Oct 25;11:e80150. doi: 10.7554/eLife.80150 (PMC9596158; doi:10.7554/eLife.80150)
Supplement: Figure 2—source data 1. [file elife-80150-fig2-data1.xlsx]

## Sheet: Figure2-source data 1
Figure 2-source data 1. The 9 genes included in the AIDPS
ENSEMBL	SYMBOL
ENSG00000143416	SELENBP1
ENSG00000057019	DCBLD2
ENSG00000124882	EREG
ENSG00000148926	ADM
ENSG00000170779	CDCA4
ENSG00000068489	PRR11
ENSG00000092929	UNC13D
ENSG00000101333	PLCB4
ENSG00000198959	TGM2
