# Supplementary material for: Comprehensive machine-learning survival framework develops a consensus model in large-scale multicenter cohorts for pancreatic cancer
Source: eLife. 2022 Oct 25;11:e80150. doi: 10.7554/eLife.80150 (PMC9596158; doi:10.7554/eLife.80150)
Supplement: Figure 4—source data 1. [file elife-80150-fig4-data1.xlsx]

## Sheet: Figure4-source data 1
Figure 4-source data 1. Details of 86 published mRNA/LncRNA signatures in PACA.
Model	PMID	Type	Author	Year	Coef	Gene	ENSEMBL
Model-1	34930261	mRNA	Cai W	2021	0.912	CA12	ENSG00000074410
Model-1	34930261	mRNA	Cai W	2021	0.9	CDA	ENSG00000158825
Model-1	34930261	mRNA	Cai W	2021	-3.3881	DGKZ	ENSG00000149091
Model-1	34930261	mRNA	Cai W	2021	6.769	GMPS	ENSG00000163655
Model-1	34930261	mRNA	Cai W	2021	-6.0982	PI4KB	ENSG00000143393
Model-2	33465729	mRNA	Chen B	2021	-0.1661	AGT	ENSG00000135744
Model-2	33465729	mRNA	Chen B	2021	0.1638	CXCL9	ENSG00000138755
Model-2	33465729	mRNA	Chen B	2021	0.2654	EGF	ENSG00000138798
Model-2	33465729	mRNA	Chen B	2021	0.5676	MET	ENSG00000105976
Model-2	33465729	mRNA	Chen B	2021	0.1655	RARRES3	ENSG00000133321
Model-2	33465729	mRNA	Chen B	2021	0.1964	S100A14	ENSG00000189334
Model-2	33465729	mRNA	Chen B	2021	0.0953	SPP1	ENSG00000118785
Model-3	34691034	mRNA	Chen D	2021	-0.45	GDF11	ENSG00000135414
Model-3	34691034	mRNA	Chen D	2021	0.025	IL18	ENSG00000150782
Model-3	34691034	mRNA	Chen D	2021	0.18	PLAU	ENSG00000122861
Model-3	34691034	mRNA	Chen D	2021	0.03	S100A16	ENSG00000188643
Model-3	34691034	mRNA	Chen D	2021	-0.02	NR0B1	ENSG00000169297
Model-3	34691034	mRNA	Chen D	2021	0.17	SEMA3C	ENSG00000075223
Model-3	34691034	mRNA	Chen D	2021	0.01	PPP3CA	ENSG00000138814
Model-4	26247463	mRNA	Chen DT	2015	0.157	C6orf15	ENSG00000204542
Model-4	26247463	mRNA	Chen DT	2015	0.178	CAPN8	ENSG00000203697
Model-4	26247463	mRNA	Chen DT	2015	0.22	HIST1H3H	ENSG00000278828
Model-4	26247463	mRNA	Chen DT	2015	0.234	IGF2BP3	ENSG00000136231
Model-4	26247463	mRNA	Chen DT	2015	0.243	SCEL	ENSG00000136155
Model-4	26247463	mRNA	Chen DT	2015	0.261	KIF14	ENSG00000118193
Model-4	26247463	mRNA	Chen DT	2015	0.247	KRT6A	ENSG00000205420
Model-4	26247463	mRNA	Chen DT	2015	0.281	SLC2A1	ENSG00000117394
Model-4	26247463	mRNA	Chen DT	2015	0.247	PMAIP1	ENSG00000141682
Model-4	26247463	mRNA	Chen DT	2015	0.157	PPBP	ENSG00000163736
Model-4	26247463	mRNA	Chen DT	2015	0.17	UCA1	ENSG00000214049
Model-4	26247463	mRNA	Chen DT	2015	0.256	RTKN2	ENSG00000182010
Model-4	26247463	mRNA	Chen DT	2015	0.271	SLC45A3	ENSG00000158715
Model-4	26247463	mRNA	Chen DT	2015	0.271	SERPINB5	ENSG00000206075
Model-4	26247463	mRNA	Chen DT	2015	0.208	TMPRSS3	ENSG00000160183
Model-5	30710069	mRNA	Chen H	2019	0.65	MAP4K4	ENSG00000071054
Model-5	30710069	mRNA	Chen H	2019	0.129	IGF2BP3	ENSG00000136231
Model-5	30710069	mRNA	Chen H	2019	0.195	SULT1E1	ENSG00000109193
Model-6	31102348	mRNA	Chen K	2019	0.4099	HSBP1L1	ENSG00000226742
Model-6	31102348	mRNA	Chen K	2019	-0.3448	D--H10	ENSG00000197653
Model-6	31102348	mRNA	Chen K	2019	-0.3725	KIAA0513	ENSG00000135709
Model-6	31102348	mRNA	Chen K	2019	1.3175	MRPL3	ENSG00000114686
Model-7	34632851	mRNA	Chen Q	2021	0.2805	B3GNT3	ENSG00000179913
Model-7	34632851	mRNA	Chen Q	2021	0.3705	BCAT1	ENSG00000060982
Model-7	34632851	mRNA	Chen Q	2021	0.4273	KYNU	ENSG00000115919
Model-7	34632851	mRNA	Chen Q	2021	0.3774	LDHA	ENSG00000134333
Model-7	34632851	mRNA	Chen Q	2021	0.549	TYMS	ENSG00000176890
Model-8	34276760	mRNA	Chen S	2021	-0.3281	COL2A1	ENSG00000139219
Model-8	34276760	mRNA	Chen S	2021	-0.3961	CUX2	ENSG00000111249
Model-8	34276760	mRNA	Chen S	2021	0.2074	CXCL10	ENSG00000169245
Model-8	34276760	mRNA	Chen S	2021	-0.1998	TRPC7	ENSG00000069018
Model-9	34094925	mRNA	Chen S_2	2021	-0.329	COL11A1	ENSG00000060718
Model-9	34094925	mRNA	Chen S_2	2021	-1.358	COL12A1	ENSG00000111799
Model-9	34094925	mRNA	Chen S_2	2021	3.811	COL1A1	ENSG00000108821
Model-9	34094925	mRNA	Chen S_2	2021	-12.93	COL3A1	ENSG00000168542
Model-9	34094925	mRNA	Chen S_2	2021	3.86	COL5A2	ENSG00000204262
Model-9	34094925	mRNA	Chen S_2	2021	10.44	COL6A3	ENSG00000163359
Model-9	34094925	mRNA	Chen S_2	2021	-0.2232	ITGA2	ENSG00000164171
Model-9	34094925	mRNA	Chen S_2	2021	4.88	MMP14	ENSG00000157227
Model-9	34094925	mRNA	Chen S_2	2021	-4.655	THBS2	ENSG00000186340
Model-10	34090418	mRNA	Chen Y	2021	-0.5399	CBX8	ENSG00000141570
Model-10	34090418	mRNA	Chen Y	2021	-0.5193	CENPT	ENSG00000102901
Model-10	34090418	mRNA	Chen Y	2021	0.7465	DPY30	ENSG00000162961
Model-10	34090418	mRNA	Chen Y	2021	0.1046	PADI1	ENSG00000142623
Model-11	32310997	mRNA	Demirkol CS	2020	1	ARNTL2	ENSG00000029153
Model-11	32310997	mRNA	Demirkol CS	2020	-1	C2orf42	ENSG00000115998
Model-11	32310997	mRNA	Demirkol CS	2020	-1	CADPS2	ENSG00000081803
Model-11	32310997	mRNA	Demirkol CS	2020	-1	CBX7	ENSG00000100307
Model-11	32310997	mRNA	Demirkol CS	2020	1	EPS8	ENSG00000151491
Model-11	32310997	mRNA	Demirkol CS	2020	1	ERRFI1	ENSG00000116285
Model-11	32310997	mRNA	Demirkol CS	2020	-1	KANK1	ENSG00000107104
Model-11	32310997	mRNA	Demirkol CS	2020	1	GSK3B	ENSG00000082701
Model-11	32310997	mRNA	Demirkol CS	2020	-1	PITP--	ENSG00000174238
Model-11	32310997	mRNA	Demirkol CS	2020	1	LDHA	ENSG00000134333
Model-11	32310997	mRNA	Demirkol CS	2020	1	MAP4K4	ENSG00000071054
Model-11	32310997	mRNA	Demirkol CS	2020	-1	MIA3	ENSG00000154305
Model-11	32310997	mRNA	Demirkol CS	2020	1	TRIO	ENSG00000038382
Model-11	32310997	mRNA	Demirkol CS	2020	-1	NDUFB2	ENSG00000090266
Model-11	32310997	mRNA	Demirkol CS	2020	1	SLC20A1	ENSG00000144136
Model-11	32310997	mRNA	Demirkol CS	2020	-1	POLR3H	ENSG00000100413
Model-11	32310997	mRNA	Demirkol CS	2020	1	RAB7A	ENSG00000075785
Model-11	32310997	mRNA	Demirkol CS	2020	1	STX16	ENSG00000124222
Model-11	32310997	mRNA	Demirkol CS	2020	1	TFG	ENSG00000114354
Model-11	32310997	mRNA	Demirkol CS	2020	-1	ZNF557	ENSG00000130544
Model-12	33865399	mRNA	Ding J	2021	-0.799	ENO3	ENSG00000108515
Model-12	33865399	mRNA	Ding J	2021	1.026	LDHA	ENSG00000134333
Model-12	33865399	mRNA	Ding J	2021	-0.484	PGK1	ENSG00000102144
Model-12	33865399	mRNA	Ding J	2021	0.415	PGM1	ENSG00000079739
Model-13	34290570	mRNA	Dong Y	2021	0.32	ANO1	ENSG00000131620
Model-13	34290570	mRNA	Dong Y	2021	0.135	FAM83A	ENSG00000147689
Model-13	34290570	mRNA	Dong Y	2021	0.003	GPR87	ENSG00000138271
Model-13	34290570	mRNA	Dong Y	2021	0.0002	ITGB6	ENSG00000115221
Model-13	34290570	mRNA	Dong Y	2021	0.15	KLK10	ENSG00000129451
Model-13	34290570	mRNA	Dong Y	2021	0.03	SERPINE1	ENSG00000106366
Model-13	34290570	mRNA	Dong Y	2021	-0.18	SMIM32	ENSG00000271824
Model-14	34095229	mRNA	Feng Z	2021	0.2342	ASPH	ENSG00000198363
Model-14	34095229	mRNA	Feng Z	2021	-0.6197	BLOC1S3	ENSG00000189114
Model-14	34095229	mRNA	Feng Z	2021	0.162	FAM83A	ENSG00000147689
Model-14	34095229	mRNA	Feng Z	2021	0.2842	DDX10	ENSG00000178105
Model-14	34095229	mRNA	Feng Z	2021	-0.2568	PPM1H	ENSG00000111110
Model-14	34095229	mRNA	Feng Z	2021	-0.2905	NR0B2	ENSG00000131910
Model-14	34095229	mRNA	Feng Z	2021	-0.4056	SLAMF6	ENSG00000162739
Model-15	32958051	mRNA	Feng Z_2	2020	0.3111	DCBLD2	ENSG00000057019
Model-15	32958051	mRNA	Feng Z_2	2020	0.2939	GSDMD	ENSG00000104518
Model-15	32958051	mRNA	Feng Z_2	2020	0.5141	PLOD2	ENSG00000152952
Model-15	32958051	mRNA	Feng Z_2	2020	0.1919	PMAIP1	ENSG00000141682
Model-16	33748108	mRNA	Feng Z_3	2021	0.42	EREG	ENSG00000124882
Model-16	33748108	mRNA	Feng Z_3	2021	-0.61	MCM3AP	ENSG00000160294
Model-16	33748108	mRNA	Feng Z_3	2021	0.33	MCM7	ENSG00000166508
Model-16	33748108	mRNA	Feng Z_3	2021	-0.441	KCTD13	ENSG00000174943
Model-16	33748108	mRNA	Feng Z_3	2021	0.328	POLG2	ENSG00000256525
Model-16	33748108	mRNA	Feng Z_3	2021	0.263	TP73	ENSG00000078900
Model-16	33748108	mRNA	Feng Z_3	2021	-0.542	TERF2	ENSG00000132604
Model-17	33996821	mRNA	Feng Z_4	2021	0.3041	DLX2	ENSG00000115844
Model-17	33996821	mRNA	Feng Z_4	2021	0.2146	ITGB6	ENSG00000115221
Model-17	33996821	mRNA	Feng Z_4	2021	-0.2424	FGF9	ENSG00000102678
Model-17	33996821	mRNA	Feng Z_4	2021	-0.1568	LGR5	ENSG00000139292
Model-17	33996821	mRNA	Feng Z_4	2021	0.6384	MYC	ENSG00000136997
Model-17	33996821	mRNA	Feng Z_4	2021	-0.4059	IL6R	ENSG00000160712
Model-17	33996821	mRNA	Feng Z_4	2021	-0.4479	TNFSF12	ENSG00000239697
Model-17	33996821	mRNA	Feng Z_4	2021	-0.1231	S100A2	ENSG00000196754
Model-18	34631790	mRNA	Feng Z_5	2021	0.2247	CAV1	ENSG00000105974
Model-18	34631790	mRNA	Feng Z_5	2021	0.265	DDIT4	ENSG00000168209
Model-18	34631790	mRNA	Feng Z_5	2021	-0.24	SLC40A1	ENSG00000138449
Model-18	34631790	mRNA	Feng Z_5	2021	0.9346	SRXN1	ENSG00000271303
Model-18	34631790	mRNA	Feng Z_5	2021	0.1441	TFAP2C	ENSG00000087510
Model-19	33550277	mRNA	Gu M	2021	-0.884	CCNT1	ENSG00000129315
Model-19	33550277	mRNA	Gu M	2021	-2.446	HMOX2	ENSG00000103415
Model-19	33550277	mRNA	Gu M	2021	-1.934	ITGB3	ENSG00000259207
Model-19	33550277	mRNA	Gu M	2021	-3.871	SDS	ENSG00000135094
Model-20	33845841	mRNA	Gu X	2021	0.3784	FCGR2B	ENSG00000072694
Model-20	33845841	mRNA	Gu X	2021	0.4762	HLA-DRA	ENSG00000204287
Model-20	33845841	mRNA	Gu X	2021	-1.0217	IL10RA	ENSG00000110324
Model-21	25587357	mRNA	Haider S	2014	0.1231	ADAMTS14	ENSG00000138316
Model-21	25587357	mRNA	Haider S	2014	0.2345	ADM	ENSG00000148926
Model-21	25587357	mRNA	Haider S	2014	-0.2444	ARRB1	ENSG00000137486
Model-21	25587357	mRNA	Haider S	2014	-0.4377	B3GNT1	ENSG00000170340
Model-21	25587357	mRNA	Haider S	2014	0.0751	BLM	ENSG00000197299
Model-21	25587357	mRNA	Haider S	2014	-0.3389	CADPS	ENSG00000163618
Model-21	25587357	mRNA	Haider S	2014	0.3667	CDC45	ENSG00000093009
Model-21	25587357	mRNA	Haider S	2014	0.1296	CDK2AP1	ENSG00000111328
Model-21	25587357	mRNA	Haider S	2014	-0.0317	CIT	ENSG00000122966
Model-21	25587357	mRNA	Haider S	2014	0.1527	CKAP2L	ENSG00000169607
Model-21	25587357	mRNA	Haider S	2014	-0.1648	CNNM3	ENSG00000168763
Model-21	25587357	mRNA	Haider S	2014	-0.2899	EIF4E3	ENSG00000163412
Model-21	25587357	mRNA	Haider S	2014	0.184	KIF14	ENSG00000118193
Model-21	25587357	mRNA	Haider S	2014	0.1349	GRPEL2	ENSG00000164284
Model-21	25587357	mRNA	Haider S	2014	-0.3216	GTF2IRD2	ENSG00000196275
Model-21	25587357	mRNA	Haider S	2014	-0.1804	GTF2IRD2B	ENSG00000174428
Model-21	25587357	mRNA	Haider S	2014	-0.1242	ICOSLG	ENSG00000277117
Model-21	25587357	mRNA	Haider S	2014	0.2668	IGF2BP2	ENSG00000073792
Model-21	25587357	mRNA	Haider S	2014	0.4462	IL20RB	ENSG00000174564
Model-21	25587357	mRNA	Haider S	2014	0.1777	NPLOC4	ENSG00000182446
Model-21	25587357	mRNA	Haider S	2014	0.5888	ITGA5	ENSG00000161638
Model-21	25587357	mRNA	Haider S	2014	-0.0662	ITGBL1	ENSG00000198542
Model-21	25587357	mRNA	Haider S	2014	0.5459	KIF4A	ENSG00000090889
Model-21	25587357	mRNA	Haider S	2014	-0.366	NOSTRIN	ENSG00000163072
Model-21	25587357	mRNA	Haider S	2014	0.5742	SEMA3A	ENSG00000075213
Model-21	25587357	mRNA	Haider S	2014	-0.1145	SKA3	ENSG00000165480
Model-21	25587357	mRNA	Haider S	2014	0.2209	PHLDA1	ENSG00000139289
Model-21	25587357	mRNA	Haider S	2014	0.3898	SLC20A1	ENSG00000144136
Model-21	25587357	mRNA	Haider S	2014	0.3201	PXN	ENSG00000089159
Model-21	25587357	mRNA	Haider S	2014	-0.1181	QDPR	ENSG00000151552
Model-21	25587357	mRNA	Haider S	2014	0.3173	TMEM26	ENSG00000196932
Model-21	25587357	mRNA	Haider S	2014	0.1134	RFX8	ENSG00000196460
Model-21	25587357	mRNA	Haider S	2014	0.1698	RPL39L	ENSG00000163923
Model-21	25587357	mRNA	Haider S	2014	-0.2347	RPSAP58	ENSG00000225178
Model-21	25587357	mRNA	Haider S	2014	-0.1939	ZNF471	ENSG00000196263
Model-21	25587357	mRNA	Haider S	2014	0.3158	SSX3	ENSG00000165584
Model-22	32702921	mRNA	He QL	2020	0.02	BICC1	ENSG00000122870
Model-22	32702921	mRNA	He QL	2020	0.052	CYSLTR1	ENSG00000173198
Model-22	32702921	mRNA	He QL	2020	0.031	GBP5	ENSG00000154451
Model-22	32702921	mRNA	He QL	2020	0.078	P2RY6	ENSG00000171631
Model-22	32702921	mRNA	He QL	2020	-0.322	RAB39B	ENSG00000155961
Model-22	32702921	mRNA	He QL	2020	-0.449	VENTX	ENSG00000151650
Model-22	32702921	mRNA	He QL	2020	0.121	SLC7A14	ENSG00000013293
Model-23	32754191	mRNA	Hou J	2020	0.34	HNRNPC	ENSG00000092199
Model-23	32754191	mRNA	Hou J	2020	-0.11	METTL3	ENSG00000165819
Model-23	32754191	mRNA	Hou J	2020	0.28	IGF2BP2	ENSG00000073792
Model-23	32754191	mRNA	Hou J	2020	0.04	IGF2BP3	ENSG00000136231
Model-23	32754191	mRNA	Hou J	2020	0.28	KIAA1429	ENSG00000164944
Model-23	32754191	mRNA	Hou J	2020	-0.37	YTHDF1	ENSG00000149658
Model-24	34671679	mRNA	Huang XY	2021	-1.1241	BIRC5	ENSG00000089685
Model-24	34671679	mRNA	Huang XY	2021	-2.5941	BUB1	ENSG00000169679
Model-24	34671679	mRNA	Huang XY	2021	3.3769	CCNB2	ENSG00000157456
Model-24	34671679	mRNA	Huang XY	2021	3.7166	CDK1	ENSG00000170312
Model-24	34671679	mRNA	Huang XY	2021	5.0568	TPX2	ENSG00000088325
Model-24	34671679	mRNA	Huang XY	2021	-3.0209	UBE2C	ENSG00000175063
Model-24	34671679	mRNA	Huang XY	2021	-4.0606	ZWINT	ENSG00000122952
Model-25	34122496	mRNA	Huo J	2021	-0.0995	ABCA5	ENSG00000154265
Model-25	34122496	mRNA	Huo J	2021	0.0562	CAC--2D4	ENSG00000151062
Model-25	34122496	mRNA	Huo J	2021	0.004	GALNT10	ENSG00000164574
Model-25	34122496	mRNA	Huo J	2021	0.0064	DPYD	ENSG00000188641
Model-25	34122496	mRNA	Huo J	2021	0.0059	GART	ENSG00000159131
Model-25	34122496	mRNA	Huo J	2021	0.0016	GPD2	ENSG00000115159
Model-25	34122496	mRNA	Huo J	2021	0.0194	MTAP	ENSG00000099810
Model-25	34122496	mRNA	Huo J	2021	0.0083	INPP4B	ENSG00000109452
Model-25	34122496	mRNA	Huo J	2021	-0.0174	IP6K1	ENSG00000176095
Model-25	34122496	mRNA	Huo J	2021	0.0062	OAS2	ENSG00000111335
Model-25	34122496	mRNA	Huo J	2021	0.002	MTHFD1	ENSG00000100714
Model-25	34122496	mRNA	Huo J	2021	-0.0197	SLC25A27	ENSG00000153291
Model-25	34122496	mRNA	Huo J	2021	0.0065	STS	ENSG00000101846
Model-25	34122496	mRNA	Huo J	2021	0.0021	SULF2	ENSG00000196562
Model-25	34122496	mRNA	Huo J	2021	-0.0126	SLC2A8	ENSG00000136856
Model-26	33819918	mRNA	Jiang P	2021	-0.2256	ATG4D	ENSG00000130734
Model-26	33819918	mRNA	Jiang P	2021	0.2279	AURKA	ENSG00000087586
Model-26	33819918	mRNA	Jiang P	2021	-1.3943	BAP1	ENSG00000163930
Model-26	33819918	mRNA	Jiang P	2021	0.2577	CAPG	ENSG00000042493
Model-26	33819918	mRNA	Jiang P	2021	0.27	CAV1	ENSG00000105974
Model-26	33819918	mRNA	Jiang P	2021	0.1823	DDIT4	ENSG00000168209
Model-26	33819918	mRNA	Jiang P	2021	0.0971	PTGS2	ENSG00000073756
Model-26	33819918	mRNA	Jiang P	2021	0.4656	MAP3K5	ENSG00000197442
Model-26	33819918	mRNA	Jiang P	2021	0.1731	MT1G	ENSG00000125144
Model-26	33819918	mRNA	Jiang P	2021	0.0247	RRM2	ENSG00000171848
Model-26	33819918	mRNA	Jiang P	2021	-0.3538	SLC1A4	ENSG00000115902
Model-26	33819918	mRNA	Jiang P	2021	-0.3383	ZNF419	ENSG00000105136
Model-26	33819918	mRNA	Jiang P	2021	0.2476	STEAP3	ENSG00000115107
Model-26	33819918	mRNA	Jiang P	2021	-0.2033	TUBE1	ENSG00000074935
Model-27	34313248	mRNA	Jiang PC	2021	-0.5699	ATG4B	ENSG00000168397
Model-27	34313248	mRNA	Jiang PC	2021	0.191	BIRC5	ENSG00000089685
Model-27	34313248	mRNA	Jiang PC	2021	1.0582	BNIP1	ENSG00000113734
Model-27	34313248	mRNA	Jiang PC	2021	1.2169	CASP4	ENSG00000196954
Model-27	34313248	mRNA	Jiang PC	2021	-0.5859	EEF2	ENSG00000167658
Model-27	34313248	mRNA	Jiang PC	2021	0.9612	EEF2K	ENSG00000103319
Model-27	34313248	mRNA	Jiang PC	2021	0.4921	ITGA3	ENSG00000005884
Model-27	34313248	mRNA	Jiang PC	2021	-0.6779	RAB24	ENSG00000169228
Model-27	34313248	mRNA	Jiang PC	2021	0.6804	ULK1	ENSG00000177169
Model-27	34313248	mRNA	Jiang PC	2021	-0.7288	TSC1	ENSG00000165699
Model-28	34659888	mRNA	Katsuta E	2021	-0.242	HOXA4	ENSG00000197576
Model-28	34659888	mRNA	Katsuta E	2021	-0.101	DMRT3	ENSG00000064218
Model-28	34659888	mRNA	Katsuta E	2021	-0.094	ISL2	ENSG00000159556
Model-28	34659888	mRNA	Katsuta E	2021	-0.098	PHKG1	ENSG00000164776
Model-28	34659888	mRNA	Katsuta E	2021	-0.19	TRA2A	ENSG00000164548
Model-29	31703415	mRNA	Kim J	2019	0.5086	E2F7	ENSG00000165891
Model-29	31703415	mRNA	Kim J	2019	0.4543	IFI44	ENSG00000137965
Model-29	31703415	mRNA	Kim J	2019	0.4618	LAMA3	ENSG00000053747
Model-29	31703415	mRNA	Kim J	2019	-0.4652	LRIG1	ENSG00000144749
Model-29	31703415	mRNA	Kim J	2019	-0.4201	SLC12A2	ENSG00000064651
Model-30	33775699	mRNA	Li A	2021	-0.14	CHST2	ENSG00000175040
Model-30	33775699	mRNA	Li A	2021	0.1755	KIF20A	ENSG00000112984
Model-30	33775699	mRNA	Li A	2021	0.0214	MET	ENSG00000105976
Model-31	32522048	lncRNA	Li M	2020	-0.0066	AC009014.3	ENSG00000271824
Model-31	32522048	lncRNA	Li M	2020	0.0093	RP11-48O20.4	ENSG00000224259
Model-31	32522048	lncRNA	Li M	2020	0.0732	UCA1	ENSG00000214049
Model-32	33747931	mRNA	Li MX	2021	-0.082	ATP8B2	ENSG00000143515
Model-32	33747931	mRNA	Li MX	2021	-0.098	BIN1	ENSG00000136717
Model-32	33747931	mRNA	Li MX	2021	-0.112	ELOM1	ENSG00000155849
Model-32	33747931	mRNA	Li MX	2021	0.051	ERAP2	ENSG00000164308
Model-32	33747931	mRNA	Li MX	2021	-0.081	FAM118A	ENSG00000100376
Model-32	33747931	mRNA	Li MX	2021	0.017	RAPGEFL1	ENSG00000108352
Model-32	33747931	mRNA	Li MX	2021	0.394	KIF23	ENSG00000137807
Model-32	33747931	mRNA	Li MX	2021	0.005	LAPTM4A	ENSG00000068697
Model-32	33747931	mRNA	Li MX	2021	0.014	RGS16	ENSG00000143333
Model-33	34394706	mRNA	Li Z	2021	0.2339	ANLN	ENSG00000011426
Model-33	34394706	mRNA	Li Z	2021	0.1041	LY6D	ENSG00000167656
Model-33	34394706	mRNA	Li Z	2021	0.126	MYEOV	ENSG00000172927
Model-33	34394706	mRNA	Li Z	2021	-0.2197	SCN11A	ENSG00000168356
Model-33	34394706	mRNA	Li Z	2021	0.1388	ZNF488	ENSG00000265763
Model-34	28979141	mRNA	Liao X	2017	0.372	ARHGAP15	ENSG00000075884
Model-34	28979141	mRNA	Liao X	2017	-0.446	ARHGAP30	ENSG00000186517
Model-34	28979141	mRNA	Liao X	2017	0.267	CD247	ENSG00000198821
Model-34	28979141	mRNA	Liao X	2017	-0.376	CD96	ENSG00000153283
Model-34	28979141	mRNA	Liao X	2017	-0.284	FAM78A	ENSG00000126882
Model-34	28979141	mRNA	Liao X	2017	-0.211	HCLS1	ENSG00000180353
Model-34	28979141	mRNA	Liao X	2017	0.001	IL16	ENSG00000172349
Model-34	28979141	mRNA	Liao X	2017	0.137	GVINP1	ENSG00000254838
Model-34	28979141	mRNA	Liao X	2017	-0.443	SLA2	ENSG00000101082
Model-35	33901011	mRNA	Lin H	2021	0.476	ANO1	ENSG00000131620
Model-35	33901011	mRNA	Lin H	2021	0.2455	DSG3	ENSG00000134757
Model-35	33901011	mRNA	Lin H	2021	-0.598	GIMAP1	ENSG00000213203
Model-35	33901011	mRNA	Lin H	2021	0.2339	SPINK1	ENSG00000164266
Model-36	33789615	mRNA	Liu X	2021	0.1254	ERRFI1	ENSG00000116285
Model-36	33789615	mRNA	Liu X	2021	-0.1365	IL6R	ENSG00000160712
Model-36	33789615	mRNA	Liu X	2021	0.1544	SCEL	ENSG00000136155
Model-36	33789615	mRNA	Liu X	2021	-0.44	PPP1R10	ENSG00000204569
Model-36	33789615	mRNA	Liu X	2021	-0.4412	SSX2IP	ENSG00000117155
Model-36	33789615	mRNA	Liu X	2021	-0.3397	PTOV1-AS2	ENSG00000269352
Model-36	33789615	mRNA	Liu X	2021	-0.2231	TXNL4A	ENSG00000141759
Model-37	34902987	mRNA	Liu Y	2022	0.0137	EREG	ENSG00000124882
Model-37	34902987	mRNA	Liu Y	2022	-0.1893	PRLR	ENSG00000113494
Model-38	33761652	mRNA	Lu Q	2021	1.012	CA9	ENSG00000107159
Model-38	33761652	mRNA	Lu Q	2021	-1.5512	CD1D	ENSG00000158473
Model-38	33761652	mRNA	Lu Q	2021	1.1969	SPOCK2	ENSG00000107742
Model-39	33575083	mRNA	Luo L	2021	0.06	ANKRD22	ENSG00000152766
Model-39	33575083	mRNA	Luo L	2021	0.029	ANLN	ENSG00000011426
Model-39	33575083	mRNA	Luo L	2021	0.233	ARNTL2	ENSG00000029153
Model-39	33575083	mRNA	Luo L	2021	0.078	DSG3	ENSG00000134757
Model-39	33575083	mRNA	Luo L	2021	0.044	PTPRR	ENSG00000153233
Model-39	33575083	mRNA	Luo L	2021	0.055	S100A14	ENSG00000189334
Model-39	33575083	mRNA	Luo L	2021	-0.127	TSPAN7	ENSG00000156298
Model-40	34660806	mRNA	Ma Z	2021	0.549	ENPP2	ENSG00000136960
Model-40	34660806	mRNA	Ma Z	2021	-0.2933	CYP2S1	ENSG00000167600
Model-40	34660806	mRNA	Ma Z	2021	-0.5766	FTCD	ENSG00000160282
Model-40	34660806	mRNA	Ma Z	2021	-0.4561	GPX3	ENSG00000211445
Model-40	34660806	mRNA	Ma Z	2021	0.3473	XDH	ENSG00000158125
Model-40	34660806	mRNA	Ma Z	2021	0.1947	UGT1A10	ENSG00000242515
Model-41	32860207	mRNA	Mantini G	2020	-0.6349	KHSRP	ENSG00000088247
Model-41	32860207	mRNA	Mantini G	2020	0.5423	PYGL	ENSG00000100504
Model-41	32860207	mRNA	Mantini G	2020	-0.7133	SPTBN1	ENSG00000115306
Model-42	34335699	mRNA	Mao M	2021	-0.2278	FGF17	ENSG00000158815
Model-42	34335699	mRNA	Mao M	2021	0.0258	IL20RB	ENSG00000174564
Model-42	34335699	mRNA	Mao M	2021	0.0251	MET	ENSG00000105976
Model-42	34335699	mRNA	Mao M	2021	-0.3925	NPPA	ENSG00000175206
Model-42	34335699	mRNA	Mao M	2021	0.0004	OASL	ENSG00000135114
Model-42	34335699	mRNA	Mao M	2021	0.0016	PLAU	ENSG00000122861
Model-42	34335699	mRNA	Mao M	2021	-0.0081	SHC2	ENSG00000129946
Model-42	34335699	mRNA	Mao M	2021	-0.1301	WFIKKN1	ENSG00000127578
Model-43	32181755	mRNA	Meng Z	2020	-0.0158	ADH1B	ENSG00000196616
Model-43	32181755	mRNA	Meng Z	2020	0.0784	CA9	ENSG00000107159
Model-43	32181755	mRNA	Meng Z	2020	-0.7636	CDHR3	ENSG00000128536
Model-43	32181755	mRNA	Meng Z	2020	-0.7038	ICAM3	ENSG00000076662
Model-43	32181755	mRNA	Meng Z	2020	0.3381	CXCL9	ENSG00000138755
Model-43	32181755	mRNA	Meng Z	2020	-0.0661	GIMAP7	ENSG00000179144
Model-43	32181755	mRNA	Meng Z	2020	-0.2418	P2RY8	ENSG00000182162
Model-43	32181755	mRNA	Meng Z	2020	-0.1146	LDLRAD1	ENSG00000203985
Model-44	32490170	mRNA	Meng Z_2	2020	-0.0744	CDHR3	ENSG00000128536
Model-44	32490170	mRNA	Meng Z_2	2020	-0.0994	CELSR3	ENSG00000008300
Model-44	32490170	mRNA	Meng Z_2	2020	0.2942	EGF	ENSG00000138798
Model-44	32490170	mRNA	Meng Z_2	2020	0.2902	FGF10	ENSG00000070193
Model-44	32490170	mRNA	Meng Z_2	2020	-0.6095	GAD1	ENSG00000128683
Model-44	32490170	mRNA	Meng Z_2	2020	0.0881	MT1H	ENSG00000205358
Model-44	32490170	mRNA	Meng Z_2	2020	-0.4845	PAH	ENSG00000171759
Model-44	32490170	mRNA	Meng Z_2	2020	0.0536	PGC	ENSG00000096088
Model-44	32490170	mRNA	Meng Z_2	2020	0.0928	NMUR2	ENSG00000132911
Model-44	32490170	mRNA	Meng Z_2	2020	-0.2357	PGM5	ENSG00000154330
Model-44	32490170	mRNA	Meng Z_2	2020	-0.334	POPDC2	ENSG00000121577
Model-44	32490170	mRNA	Meng Z_2	2020	0.065	PPFIA3	ENSG00000177380
Model-44	32490170	mRNA	Meng Z_2	2020	-0.3769	TMEM145	ENSG00000167619
Model-44	32490170	mRNA	Meng Z_2	2020	0.2099	TNNT1	ENSG00000105048
Model-44	32490170	mRNA	Meng Z_2	2020	0.3893	ZPLD1	ENSG00000170044
Model-44	32490170	mRNA	Meng Z_2	2020	0.0593	SERPINA4	ENSG00000100665
Model-45	32895958	mRNA	Nishiwada S	2021	-0.0077	AR	ENSG00000169083
Model-45	32895958	mRNA	Nishiwada S	2021	-0.0199	cABL	ENSG00000097007
Model-45	32895958	mRNA	Nishiwada S	2021	0.0137	cJUN	ENSG00000177606
Model-45	32895958	mRNA	Nishiwada S	2021	0.1063	HDAC1	ENSG00000116478
Model-45	32895958	mRNA	Nishiwada S	2021	-0.0371	IRF1	ENSG00000125347
Model-45	32895958	mRNA	Nishiwada S	2021	-0.0663	PKC-beta	ENSG00000166501
Model-45	32895958	mRNA	Nishiwada S	2021	-0.0202	PAK2	ENSG00000180370
Model-45	32895958	mRNA	Nishiwada S	2021	-0.058	RelA	ENSG00000173039
Model-45	32895958	mRNA	Nishiwada S	2021	-0.0102	STAT1	ENSG00000115415
Model-45	32895958	mRNA	Nishiwada S	2021	0.0659	SUMO1	ENSG00000116030
Model-46	34249934	mRNA	Qian H	2021	0.3119	BIRC5	ENSG00000089685
Model-46	34249934	mRNA	Qian H	2021	0.2271	CKLF	ENSG00000217555
Model-46	34249934	mRNA	Qian H	2021	0.2728	GBP2	ENSG00000162645
Model-46	34249934	mRNA	Qian H	2021	0.1752	CRABP2	ENSG00000143320
Model-46	34249934	mRNA	Qian H	2021	0.3574	CXCL11	ENSG00000169248
Model-46	34249934	mRNA	Qian H	2021	0.0155	DKK1	ENSG00000107984
Model-46	34249934	mRNA	Qian H	2021	0.1067	EREG	ENSG00000124882
Model-46	34249934	mRNA	Qian H	2021	0.3033	FAM3C	ENSG00000196937
Model-46	34249934	mRNA	Qian H	2021	0.0672	FGFRL1	ENSG00000127418
Model-46	34249934	mRNA	Qian H	2021	-0.8333	FIGNL2	ENSG00000261308
Model-46	34249934	mRNA	Qian H	2021	-0.0764	GDF9	ENSG00000164404
Model-46	34249934	mRNA	Qian H	2021	-0.4339	RFXAP	ENSG00000133111
Model-46	34249934	mRNA	Qian H	2021	-0.067	IL32	ENSG00000008517
Model-46	34249934	mRNA	Qian H	2021	-0.1976	S100A11	ENSG00000163191
Model-46	34249934	mRNA	Qian H	2021	-0.0123	SLC22A17	ENSG00000092096
Model-46	34249934	mRNA	Qian H	2021	-0.1279	PSMB8	ENSG00000204264
Model-46	34249934	mRNA	Qian H	2021	-0.4381	PSPN	ENSG00000125650
Model-46	34249934	mRNA	Qian H	2021	-0.3633	SDC4	ENSG00000124145
Model-47	32195182	mRNA	Sahni S	2020	0.856	AGR2	ENSG00000106541
Model-47	32195182	mRNA	Sahni S	2020	0.699	CADM1	ENSG00000182985
Model-47	32195182	mRNA	Sahni S	2020	0.759	JTB	ENSG00000143543
Model-47	32195182	mRNA	Sahni S	2020	0.908	TMED2	ENSG00000086598
Model-48	29340021	mRNA	Shi G	2017	-0.3775	ACSL5	ENSG00000197142
Model-48	29340021	mRNA	Shi G	2017	0.3075	AMIGO2	ENSG00000139211
Model-48	29340021	mRNA	Shi G	2017	0.4454	ARNTL2	ENSG00000029153
Model-48	29340021	mRNA	Shi G	2017	0.6208	ASPM	ENSG00000066279
Model-48	29340021	mRNA	Shi G	2017	0.4087	BIK	ENSG00000100290
Model-48	29340021	mRNA	Shi G	2017	-0.0156	CA4	ENSG00000167434
Model-48	29340021	mRNA	Shi G	2017	0.2423	COL17A1	ENSG00000065618
Model-48	29340021	mRNA	Shi G	2017	0.2441	DKK1	ENSG00000107984
Model-48	29340021	mRNA	Shi G	2017	0.7712	ERP27	ENSG00000139055
Model-48	29340021	mRNA	Shi G	2017	-0.1605	F11	ENSG00000088926
Model-48	29340021	mRNA	Shi G	2017	-0.0249	FAM3B	ENSG00000183844
Model-48	29340021	mRNA	Shi G	2017	-0.1537	MBOAT2	ENSG00000143797
Model-48	29340021	mRNA	Shi G	2017	0.2407	MT1M	ENSG00000205364
Model-48	29340021	mRNA	Shi G	2017	0.223	SERPINB5	ENSG00000206075
Model-48	29340021	mRNA	Shi G	2017	-0.4084	SLC4A4	ENSG00000080493
Model-48	29340021	mRNA	Shi G	2017	0.2769	SPOCK1	ENSG00000152377
Model-49	29239017	lncRNA	Song J	2018	-0.4645	C9orf139	ENSG00000180539
Model-49	29239017	lncRNA	Song J	2018	0.2446	CTC-327F10.4	ENSG00000251320
Model-49	29239017	lncRNA	Song J	2018	-0.7083	MIR600HG	ENSG00000236901
Model-49	29239017	lncRNA	Song J	2018	0.2256	RP5-965G21.4	ENSG00000274414
Model-49	29239017	lncRNA	Song J	2018	-0.3029	RP11-436K8.1	ENSG00000231252
Model-50	34249078	mRNA	Song W	2021	0.0361	ABCB6	ENSG00000115657
Model-50	34249078	mRNA	Song W	2021	0.0056	ALDH3B1	ENSG00000006534
Model-50	34249078	mRNA	Song W	2021	0.0003	B3GNT3	ENSG00000179913
Model-50	34249078	mRNA	Song W	2021	0.0155	CACNA1H	ENSG00000196557
Model-50	34249078	mRNA	Song W	2021	0.0364	CDK1	ENSG00000170312
Model-50	34249078	mRNA	Song W	2021	0.513	CHST12	ENSG00000136213
Model-50	34249078	mRNA	Song W	2021	0.0126	NT5E	ENSG00000135318
Model-50	34249078	mRNA	Song W	2021	0.0494	KIF20A	ENSG00000112984
Model-50	34249078	mRNA	Song W	2021	0.0015	GPR87	ENSG00000138271
Model-50	34249078	mRNA	Song W	2021	0.0246	MET	ENSG00000105976
Model-50	34249078	mRNA	Song W	2021	0.0214	PGM1	ENSG00000079739
Model-51	20644708	mRNA	Stratford JK	2010	-1.214	CDX2	ENSG00000165556
Model-51	20644708	mRNA	Stratford JK	2010	3.641	FTSJ3	ENSG00000108592
Model-51	20644708	mRNA	Stratford JK	2010	-2.342	MACF1	ENSG00000127603
Model-51	20644708	mRNA	Stratford JK	2010	-1.381	RASSF4	ENSG00000107551
Model-51	20644708	mRNA	Stratford JK	2010	2.293	STAT1	ENSG00000115415
Model-51	20644708	mRNA	Stratford JK	2010	1.9	STX2	ENSG00000111450
Model-52	33226369	mRNA	Tan Z	2020	-0.1765	CD36	ENSG00000135218
Model-52	33226369	mRNA	Tan Z	2020	-0.4314	ENO3	ENSG00000108515
Model-52	33226369	mRNA	Tan Z	2020	1.0167	MET	ENSG00000105976
Model-53	34367961	mRNA	Tan Z_2	2021	0.3261	CXCL9	ENSG00000138755
Model-53	34367961	mRNA	Tan Z_2	2021	-0.071	PYHIN1	ENSG00000163564
Model-53	34367961	mRNA	Tan Z_2	2021	-0.0366	NAPSB	ENSG00000131401
Model-53	34367961	mRNA	Tan Z_2	2021	-0.2465	ZNF831	ENSG00000124203
Model-54	33827590	mRNA	Tang R	2021	-0.0088	ARRB2	ENSG00000141480
Model-54	33827590	mRNA	Tang R	2021	-0.0073	CCDC69	ENSG00000198624
Model-54	33827590	mRNA	Tang R	2021	-0.0013	CD81	ENSG00000110651
Model-54	33827590	mRNA	Tang R	2021	-0.0423	HHEX	ENSG00000152804
Model-54	33827590	mRNA	Tang R	2021	0.0284	EIF2A	ENSG00000144895
Model-54	33827590	mRNA	Tang R	2021	-0.0104	FILIP1L	ENSG00000168386
Model-54	33827590	mRNA	Tang R	2021	0.0457	GBP1	ENSG00000117228
Model-54	33827590	mRNA	Tang R	2021	0.0017	HIST1H1C	ENSG00000187837
Model-54	33827590	mRNA	Tang R	2021	-0.0046	LCP1	ENSG00000136167
Model-54	33827590	mRNA	Tang R	2021	0.0001	REG3A	ENSG00000172016
Model-54	33827590	mRNA	Tang R	2021	0.011	MMP28	ENSG00000271447
Model-54	33827590	mRNA	Tang R	2021	-0.0094	SDC3	ENSG00000162512
Model-54	33827590	mRNA	Tang R	2021	-0.0054	PDX1	ENSG00000139515
Model-54	33827590	mRNA	Tang R	2021	0.0023	SPRR1B	ENSG00000169469
Model-54	33827590	mRNA	Tang R	2021	0.0002	PPP1R15A	ENSG00000087074
Model-54	33827590	mRNA	Tang R	2021	-0.001	TUBA1A	ENSG00000167552
Model-55	33062408	mRNA	Tang R_2	2020	0.0168	HNRNPC	ENSG00000092199
Model-55	33062408	mRNA	Tang R_2	2020	0.2623	RBM15	ENSG00000162775
Model-55	33062408	mRNA	Tang R_2	2020	0.0367	IGF2BP2	ENSG00000073792
Model-56	34511988	mRNA	Tang S	2024	-0.309	MZB1	ENSG00000170476
Model-56	34511988	mRNA	Tang S	2021	-0.502	ARID5A	ENSG00000196843
Model-56	34511988	mRNA	Tang S	2022	1.226	CLEC2B	ENSG00000110852
Model-56	34511988	mRNA	Tang S	2021	-0.757	RAPGEF1	ENSG00000107263
Model-56	34511988	mRNA	Tang S	2023	-0.419	MICAL1	ENSG00000135596
Model-57	31968179	mRNA	Tian G	2020	0.683	B3GNT3	ENSG00000179913
Model-57	31968179	mRNA	Tian G	2020	0.7	MET	ENSG00000105976
Model-57	31968179	mRNA	Tian G	2020	0.662	SPAG4	ENSG00000061656
Model-58	33718118	mRNA	Wang W	2021	-0.298	ESR2	ENSG00000140009
Model-58	33718118	mRNA	Wang W	2021	0.259	IDO1	ENSG00000131203
Model-58	33718118	mRNA	Wang W	2021	0.298	IL20RB	ENSG00000174564
Model-58	33718118	mRNA	Wang W	2021	0.172	PPP3CA	ENSG00000138814
Model-58	33718118	mRNA	Wang W	2021	0.184	PLAU	ENSG00000122861
Model-59	33546693	mRNA	Wang W_2	2021	0.1587	COL7A1	ENSG00000114270
Model-59	33546693	mRNA	Wang W_2	2021	-0.6539	DENND4B	ENSG00000198837
Model-59	33546693	mRNA	Wang W_2	2021	-0.1696	ITGA7	ENSG00000135424
Model-59	33546693	mRNA	Wang W_2	2021	0.7816	NCBP2	ENSG00000114503
Model-59	33546693	mRNA	Wang W_2	2021	-0.1696	LQK1	ENSG00000198468
Model-59	33546693	mRNA	Wang W_2	2021	-0.9365	RBM14	ENSG00000239306
Model-59	33546693	mRNA	Wang W_2	2021	-0.312	ZNF709	ENSG00000242852
Model-59	33546693	mRNA	Wang W_2	2021	0.5165	SP1	ENSG00000185591
Model-60	34898275	mRNA	Wei W	2021	-0.8874	ALOX15	ENSG00000161905
Model-60	34898275	mRNA	Wei W	2021	-0.2495	MAP1LC3A	ENSG00000101460
Model-60	34898275	mRNA	Wei W	2021	0.144	PROM2	ENSG00000155066
Model-60	34898275	mRNA	Wei W	2021	0.1044	SAT1	ENSG00000130066
Model-60	34898275	mRNA	Wei W	2021	-0.4772	SAT2	ENSG00000141504
Model-60	34898275	mRNA	Wei W	2021	0.0629	TFRC	ENSG00000072274
Model-60	34898275	mRNA	Wei W	2021	0.2362	SLC39A8	ENSG00000138821
Model-61	33731794	mRNA	Wei X	2021	0.0238	ANO1	ENSG00000131620
Model-61	33731794	mRNA	Wei X	2021	-0.0244	AP1M2	ENSG00000129354
Model-61	33731794	mRNA	Wei X	2021	0.3211	BVES	ENSG00000112276
Model-61	33731794	mRNA	Wei X	2021	-0.0105	C4orf19	ENSG00000154274
Model-61	33731794	mRNA	Wei X	2021	-0.1332	CAC--1D	ENSG00000157388
Model-61	33731794	mRNA	Wei X	2021	-0.275	CCDC148	ENSG00000153237
Model-61	33731794	mRNA	Wei X	2021	0.1158	INPP4B	ENSG00000109452
Model-61	33731794	mRNA	Wei X	2021	0.1943	NET1	ENSG00000173848
Model-61	33731794	mRNA	Wei X	2021	0.2316	INSIG2	ENSG00000125629
Model-61	33731794	mRNA	Wei X	2021	0.11	SCEL	ENSG00000136155
Model-61	33731794	mRNA	Wei X	2021	-0.0932	PARP1	ENSG00000143799
Model-61	33731794	mRNA	Wei X	2021	-0.125	POLD3	ENSG00000077514
Model-61	33731794	mRNA	Wei X	2021	-0.1514	SH3RF2	ENSG00000156463
Model-61	33731794	mRNA	Wei X	2021	0.0387	VGLL1	ENSG00000102243
Model-62	32943033	mRNA	Wu C	2020	0.022	AADAC	ENSG00000114771
Model-62	32943033	mRNA	Wu C	2020	-0.989	CHFR	ENSG00000072609
Model-62	32943033	mRNA	Wu C	2020	0.007	HIST1H1C	ENSG00000187837
Model-62	32943033	mRNA	Wu C	2020	-0.32	DEF8	ENSG00000140995
Model-62	32943033	mRNA	Wu C	2020	0.041	MET	ENSG00000105976
Model-63	32596278	mRNA	Wu G	2020	0.9452	CKLF	ENSG00000217555
Model-63	32596278	mRNA	Wu G	2020	0.2968	ERAP2	ENSG00000164308
Model-63	32596278	mRNA	Wu G	2020	0.3896	EREG	ENSG00000124882
Model-64	31612115	mRNA	Wu M	2019	0.0041	ANKRD22	ENSG00000152766
Model-64	31612115	mRNA	Wu M	2019	0.0066	COL17A1	ENSG00000065618
Model-64	31612115	mRNA	Wu M	2019	0.0991	ARNTL2	ENSG00000029153
Model-64	31612115	mRNA	Wu M	2019	0.1188	CEP55	ENSG00000138180
Model-64	31612115	mRNA	Wu M	2019	-0.0076	MCOLN3	ENSG00000055732
Model-64	31612115	mRNA	Wu M	2019	0.126	MET	ENSG00000105976
Model-64	31612115	mRNA	Wu M	2019	0.0479	ITGB6	ENSG00000115221
Model-64	31612115	mRNA	Wu M	2019	0.0276	KLK10	ENSG00000129451
Model-64	31612115	mRNA	Wu M	2019	-0.0397	SLC25A45	ENSG00000162241
Model-65	33033514	mRNA	Wu M_2	2020	0.0921	KIF14	ENSG00000118193
Model-65	33033514	mRNA	Wu M_2	2020	0.0097	GPR87	ENSG00000138271
Model-65	33033514	mRNA	Wu M_2	2020	0.0024	RACGAP1	ENSG00000161800
Model-65	33033514	mRNA	Wu M_2	2020	0.1136	TPX2	ENSG00000088325
Model-65	33033514	mRNA	Wu M_2	2020	0.0797	MMP28	ENSG00000271447
Model-65	33033514	mRNA	Wu M_2	2020	0.1156	RARRES3	ENSG00000133321
Model-65	33033514	mRNA	Wu M_2	2020	-0.0711	TSPAN7	ENSG00000156298
Model-66	33316381	mRNA	Xu D	2021	0.6265	AIM1	ENSG00000112297
Model-66	33316381	mRNA	Xu D	2021	0.6251	ARHGAP18	ENSG00000146376
Model-66	33316381	mRNA	Xu D	2021	0.5097	CAC--2D4	ENSG00000151062
Model-66	33316381	mRNA	Xu D	2021	-1.0684	MICAL1	ENSG00000135596
Model-66	33316381	mRNA	Xu D	2021	0.6057	DCBLD1	ENSG00000164465
Model-66	33316381	mRNA	Xu D	2021	0.1313	KLHDC7B	ENSG00000130487
Model-66	33316381	mRNA	Xu D	2021	-0.4401	KLHL32	ENSG00000186231
Model-66	33316381	mRNA	Xu D	2021	-0.4933	UNC13B	ENSG00000198722
Model-66	33316381	mRNA	Xu D	2021	-1.1333	TSPYL4	ENSG00000187189
Model-67	33176521	mRNA	Xu F	2021	-0.0286	ALKBH5	ENSG00000091542
Model-67	33176521	mRNA	Xu F	2021	-0.132	METTL14	ENSG00000145388
Model-67	33176521	mRNA	Xu F	2021	-0.087	METTL3	ENSG00000165819
Model-67	33176521	mRNA	Xu F	2021	0.233	KIAA1429	ENSG00000164944
Model-67	33176521	mRNA	Xu F	2021	-0.035	YTHDF1	ENSG00000149658
Model-68	34717651	mRNA	Xu Q	2021	-0.5483	ABCB4	ENSG00000005471
Model-68	34717651	mRNA	Xu Q	2021	-7.7451	GH1	ENSG00000259384
Model-68	34717651	mRNA	Xu Q	2021	-0.0924	FAM53B	ENSG00000189319
Model-68	34717651	mRNA	Xu Q	2021	-0.5285	INTU	ENSG00000164066
Model-68	34717651	mRNA	Xu Q	2021	-0.432	SPINK2	ENSG00000128040
Model-69	30643453	mRNA	Yan X	2018	0.4623	CDC6	ENSG00000094804
Model-69	30643453	mRNA	Yan X	2018	0.4106	IGF2BP2	ENSG00000073792
Model-69	30643453	mRNA	Yan X	2018	0.3707	KNTC1	ENSG00000184445
Model-69	30643453	mRNA	Yan X	2018	-0.4705	LYRM1	ENSG00000102897
Model-70	33968691	mRNA	Yang B	2021	2.8607	CHST11	ENSG00000171310
Model-70	33968691	mRNA	Yang B	2021	-0.5144	CRHBP	ENSG00000145708
Model-70	33968691	mRNA	Yang B	2021	0.7636	CXCL5	ENSG00000163735
Model-70	33968691	mRNA	Yang B	2021	-1.1445	GALNT16	ENSG00000100626
Model-70	33968691	mRNA	Yang B	2021	0.4442	MUC16	ENSG00000181143
Model-70	33968691	mRNA	Yang B	2021	-2.1059	NOD2	ENSG00000167207
Model-70	33968691	mRNA	Yang B	2021	1.0661	ZNF683	ENSG00000176083
Model-71	33386701	mRNA	Ye Y	2020	-0.0666	CA8	ENSG00000178538
Model-71	33386701	mRNA	Ye Y	2020	0.0413	CEP55	ENSG00000138180
Model-71	33386701	mRNA	Ye Y	2020	-0.2189	GNB3	ENSG00000111664
Model-71	33386701	mRNA	Ye Y	2020	-0.0339	SGSM2	ENSG00000141258
Model-72	34262410	mRNA	Yu J	2021	1.3721	APOL1	ENSG00000100342
Model-72	34262410	mRNA	Yu J	2021	0.769	PTK6	ENSG00000101213
Model-72	34262410	mRNA	Yu J	2021	-0.863	RAB24	ENSG00000169228
Model-72	34262410	mRNA	Yu J	2021	0.442	TP63	ENSG00000073282
Model-73	34820374	mRNA	Yu X_2	2021	0.34	CD44	ENSG00000026508
Model-73	34820374	mRNA	Yu X_2	2021	0.216	MT1G	ENSG00000125144
Model-73	34820374	mRNA	Yu X_2	2021	0.225	SAT1	ENSG00000130066
Model-73	34820374	mRNA	Yu X_2	2021	0.05	PTGS2	ENSG00000073756
Model-73	34820374	mRNA	Yu X_2	2021	0.186	TFRC	ENSG00000072274
Model-73	34820374	mRNA	Yu X_2	2021	0.207	STEAP3	ENSG00000115107
Model-74	34233576	lncRNA	Yuan Q	2021	0.3069	AC099850.3	ENSG00000265415
Model-74	34233576	lncRNA	Yuan Q	2021	-0.7104	AL513165.1	ENSG00000256966
Model-74	34233576	lncRNA	Yuan Q	2021	0.2433	AP005233.2	ENST00000561588
Model-74	34233576	lncRNA	Yuan Q	2021	-0.6473	PTOV1-AS2	ENSG00000269352
Model-74	34233576	lncRNA	Yuan Q	2021	0.1555	UCA1	ENSG00000214049
Model-75	34490033	mRNA	Yuan Q_2	2021	0.5671	SP1	ENSG00000185591
Model-75	34490033	mRNA	Yuan Q_2	2021	-1.147	SAFB	ENSG00000160633
Model-75	34490033	mRNA	Yuan Q_2	2021	0.4489	SERTAD3	ENSG00000167565
Model-76	32203889	mRNA	Yue P	2020	0.1063	CASP4	ENSG00000196954
Model-76	32203889	mRNA	Yue P	2020	0.0297	EIF4G1	ENSG00000114867
Model-76	32203889	mRNA	Yue P	2020	0.0416	CHMP2B	ENSG00000083937
Model-76	32203889	mRNA	Yue P	2020	-0.0498	GABARAP	ENSG00000170296
Model-76	32203889	mRNA	Yue P	2020	-0.1453	RAB24	ENSG00000169228
Model-76	32203889	mRNA	Yue P	2020	-0.3239	RPTOR	ENSG00000141564
Model-76	32203889	mRNA	Yue P	2020	0.0983	NCKAP1	ENSG00000061676
Model-76	32203889	mRNA	Yue P	2020	-0.2125	PELP1	ENSG00000141456
Model-76	32203889	mRNA	Yue P	2020	0.0078	TNFSF10	ENSG00000121858
Model-76	32203889	mRNA	Yue P	2020	-0.1622	WIPI2	ENSG00000157954
Model-77	33869254	mRNA	Zhang C	2021	-0.3606	AGT	ENSG00000135744
Model-77	33869254	mRNA	Zhang C	2021	-0.6498	CMTM6	ENSG00000091317
Model-77	33869254	mRNA	Zhang C	2021	0.3408	AREG	ENSG00000109321
Model-77	33869254	mRNA	Zhang C	2021	-0.8476	B2M	ENSG00000166710
Model-77	33869254	mRNA	Zhang C	2021	0.4845	CXCL9	ENSG00000138755
Model-77	33869254	mRNA	Zhang C	2021	0.5668	LTBP1	ENSG00000049323
Model-77	33869254	mRNA	Zhang C	2021	0.5127	HBEGF	ENSG00000113070
Model-77	33869254	mRNA	Zhang C	2021	0.8248	MET	ENSG00000105976
Model-77	33869254	mRNA	Zhang C	2021	0.1701	IL22RA1	ENSG00000142677
Model-77	33869254	mRNA	Zhang C	2021	0.4116	OAS1	ENSG00000089127
Model-77	33869254	mRNA	Zhang C	2021	0.127	PI3	ENSG00000124102
Model-77	33869254	mRNA	Zhang C	2021	0.1783	LCN2	ENSG00000148346
Model-77	33869254	mRNA	Zhang C	2021	-0.5991	NRP2	ENSG00000118257
Model-77	33869254	mRNA	Zhang C	2021	0.512	OASL	ENSG00000135114
Model-77	33869254	mRNA	Zhang C	2021	0.67	PAK3	ENSG00000077264
Model-77	33869254	mRNA	Zhang C	2021	-1.284	PLAUR	ENSG00000011422
Model-77	33869254	mRNA	Zhang C	2021	0.2425	PTGS2	ENSG00000073756
Model-77	33869254	mRNA	Zhang C	2021	0.3596	TMSB10	ENSG00000034510
Model-77	33869254	mRNA	Zhang C	2021	0.2132	SPP1	ENSG00000118785
Model-77	33869254	mRNA	Zhang C	2021	0.8734	S100A16	ENSG00000188643
Model-77	33869254	mRNA	Zhang C	2021	-0.6231	SDC4	ENSG00000124145
Model-78	34124046	mRNA	Zhang F	2021	-0.269	ARNT2	ENSG00000172379
Model-78	34124046	mRNA	Zhang F	2021	0.387	LINC01559	ENSG00000180861
Model-78	34124046	mRNA	Zhang F	2021	-0.395	SLC26A11	ENSG00000181045
Model-78	34124046	mRNA	Zhang F	2021	-0.374	TRIM67	ENSG00000119283
Model-78	34124046	mRNA	Zhang F	2021	0.314	UCA1	ENSG00000214049
Model-79	31031865	lncRNA	Zhang H	2019	0.028	ABHD11-AS1	ENSG00000225969
Model-79	31031865	lncRNA	Zhang H	2019	-0.453	AP000254.8	ENSG00000273271
Model-79	31031865	lncRNA	Zhang H	2019	0.198	CASC8	ENSG00000246228
Model-79	31031865	lncRNA	Zhang H	2019	-0.353	CTC-429P9.3	ENSG00000269044
Model-79	31031865	lncRNA	Zhang H	2019	-0.534	CTD-2186M15.3	ENSG00000272086
Model-79	31031865	lncRNA	Zhang H	2019	0.149	CYTOR	ENSG00000222041
Model-79	31031865	lncRNA	Zhang H	2019	0.108	LINC00941	ENSG00000235884
Model-79	31031865	lncRNA	Zhang H	2019	-0.335	LINC01089	ENSG00000212694
Model-79	31031865	lncRNA	Zhang H	2019	0.332	MIR4435-2HG	ENSG00000172965
Model-79	31031865	lncRNA	Zhang H	2019	-0.26	RP5-1085F17.3	ENSG00000260257
Model-79	31031865	lncRNA	Zhang H	2019	-0.197	RP5-890O3.9	ENSG00000240731
Model-79	31031865	lncRNA	Zhang H	2019	0.009	UCA1	ENSG00000214049
Model-80	33691542	mRNA	Zhang LL	2021	0.3543	ARNTL	ENSG00000133794
Model-80	33691542	mRNA	Zhang LL	2021	-0.2464	CRY1	ENSG00000008405
Model-80	33691542	mRNA	Zhang LL	2021	-0.4626	CRY2	ENSG00000121671
Model-80	33691542	mRNA	Zhang LL	2021	-0.2177	CSNK1D	ENSG00000141551
Model-80	33691542	mRNA	Zhang LL	2021	0.1566	CSNK1E	ENSG00000213923
Model-80	33691542	mRNA	Zhang LL	2021	-0.1878	CUL1	ENSG00000055130
Model-80	33691542	mRNA	Zhang LL	2021	-0.2242	DBP	ENSG00000105516
Model-80	33691542	mRNA	Zhang LL	2021	0.1836	NR1D1	ENSG00000126368
Model-80	33691542	mRNA	Zhang LL	2021	0.0974	RORA	ENSG00000069667
Model-80	33691542	mRNA	Zhang LL	2021	0.6332	RORB	ENSG00000198963
Model-81	33748143	mRNA	Zhang X	2021	0.0183	CDK1	ENSG00000170312
Model-81	33748143	mRNA	Zhang X	2021	0.079	CRABP2	ENSG00000143320
Model-81	33748143	mRNA	Zhang X	2021	0.3113	NUSAP1	ENSG00000137804
Model-81	33748143	mRNA	Zhang X	2021	0.2482	PERP	ENSG00000112378
Model-81	33748143	mRNA	Zhang X	2021	0.1529	TOP2A	ENSG00000131747
Model-82	33015155	mRNA	Zhang Z	2020	-0.0481	CHGA	ENSG00000100604
Model-82	33015155	mRNA	Zhang Z	2020	0.0402	COL17A1	ENSG00000065618
Model-82	33015155	mRNA	Zhang Z	2020	0.0021	LAMC2	ENSG00000058085
Model-82	33015155	mRNA	Zhang Z	2020	0.0697	ITGB6	ENSG00000115221
Model-82	33015155	mRNA	Zhang Z	2020	0.0063	S100P	ENSG00000163993
Model-83	31595147	mRNA	Zhou C	2019	0.012	ANKRD22	ENSG00000152766
Model-83	31595147	mRNA	Zhou C	2019	0.332	MET	ENSG00000105976
Model-83	31595147	mRNA	Zhou C	2019	0.0034	IGF2BP3	ENSG00000136231
Model-83	31595147	mRNA	Zhou C	2019	0.0126	INPP4B	ENSG00000109452
Model-83	31595147	mRNA	Zhou C	2019	0.0677	KYNU	ENSG00000115919
Model-83	31595147	mRNA	Zhou C	2019	0.0413	TOP2A	ENSG00000131747
Model-84	34587439	mRNA	Zhou Q	2021	0.8544	APOL1	ENSG00000100342
Model-84	34587439	mRNA	Zhou Q	2021	-0.8465	ATG16L2	ENSG00000168010
Model-84	34587439	mRNA	Zhou Q	2021	2.0055	G--I3	ENSG00000065135
Model-84	34587439	mRNA	Zhou Q	2021	0.7124	PTK6	ENSG00000101213
Model-85	31706267	mRNA	Zhou YY	2019	-1.4	CEL	ENSG00000170835
Model-85	31706267	mRNA	Zhou YY	2019	1.321	CPA1	ENSG00000091704
Model-85	31706267	mRNA	Zhou YY	2019	0.454	POSTN	ENSG00000133110
Model-85	31706267	mRNA	Zhou YY	2019	1.011	PM20D1	ENSG00000162877
Model-86	33073486	mRNA	Zhuang H	2020	0.0036	ITGB1	ENSG00000150093
Model-86	33073486	mRNA	Zhuang H	2020	0.0013	ITGB4	ENSG00000132470
Model-86	33073486	mRNA	Zhuang H	2020	0.0032	ITGB5	ENSG00000082781
Model-86	33073486	mRNA	Zhuang H	2020	0.0055	ITGB6	ENSG00000115221
